# Supplementary material for: Phenolic Compounds of Catalpa speciosa, Taxus cuspidata, and Magnolia acuminata have Antioxidant and Anticancer Activity
Source: PubMed Central journal article supplement (PMC6384650; doi:10.3390/molecules24030412), 2019-01-23

# Phenolic Compounds of *Catalpa Speciosa*, *Taxus Cuspidate*, and *Magnolia Acuminata* have Antioxidant and Anticancer Activity

Hosam O. Elansary <sup>1,2,3,\*</sup>, Agnieszka Szopa <sup>4</sup>, Paweł Kubica <sup>4</sup>, Fahed A. Al-Mana <sup>1</sup>,  
Eman A. Mahmoud <sup>5</sup>, Tarek K. Ali Zin El-Abedin <sup>6</sup>, Mohamed A. Mattar <sup>6</sup> and Halina Ekiert <sup>4</sup>

<sup>1</sup> Plant production Department, College of Food and Agriculture Sciences, King Saud University, Riyadh 11451, Saudi Arabia; helansary@ksu.edu.sa (H.O.E.); falmana@ksu.edu.sa (F.A.A.M.)

<sup>2</sup> Floriculture, Ornamental Horticulture and Garden Design, Faculty of Agriculture, Alexandria University, 00203, Egypt

<sup>3</sup> Department of Geography, Environmental Management and Energy Studies, University of Johannesburg, Auckland Park Kingsway Campus (APK) campus, 2006, South Africa

<sup>4</sup> Department of Pharmaceutical Botany, Medical College, Jagiellonian University, ul. Medyczna 9, 30-688 Kraków, Poland; a.szopa@uj.edu.pl (A.S.); p.kubica@uj.edu.pl (P.K.); Halina Ekiert (H.E.)

<sup>5</sup> Department of Food Industries, Faculty of Agriculture, Damietta University, Damietta 34511, Egypt; emanmail2005@yahoo.com

<sup>6</sup> Department of Agricultural Engineering, College of Food and Agriculture Sciences, King Saud University, Riyadh 11451, Saudi Arabia; tkamalzein@ksu.edu.sa

\* Correspondence: helansary@ksu.edu.sa; Tel.: +966 571586389

Received: 06 January 2019; Accepted: 22 January 2019; Published: date

## Supplementary Materials:

**Supp. Fig.1** The representative HPLC-UV chromatogram ( $\lambda = 254$  nm) of *Magnolia acuminata* bark extract; 1 - protocatechuic acid (t<sub>R</sub>=6.3 min), 2 – catechin (t<sub>R</sub>=8.8 min), 3 - elgaic acid (t<sub>R</sub>=12.2 min), 4 - epigallocatechin gallate (t<sub>R</sub>=14.8 min), 5 – epicatechin (t<sub>R</sub>=19.2 min).

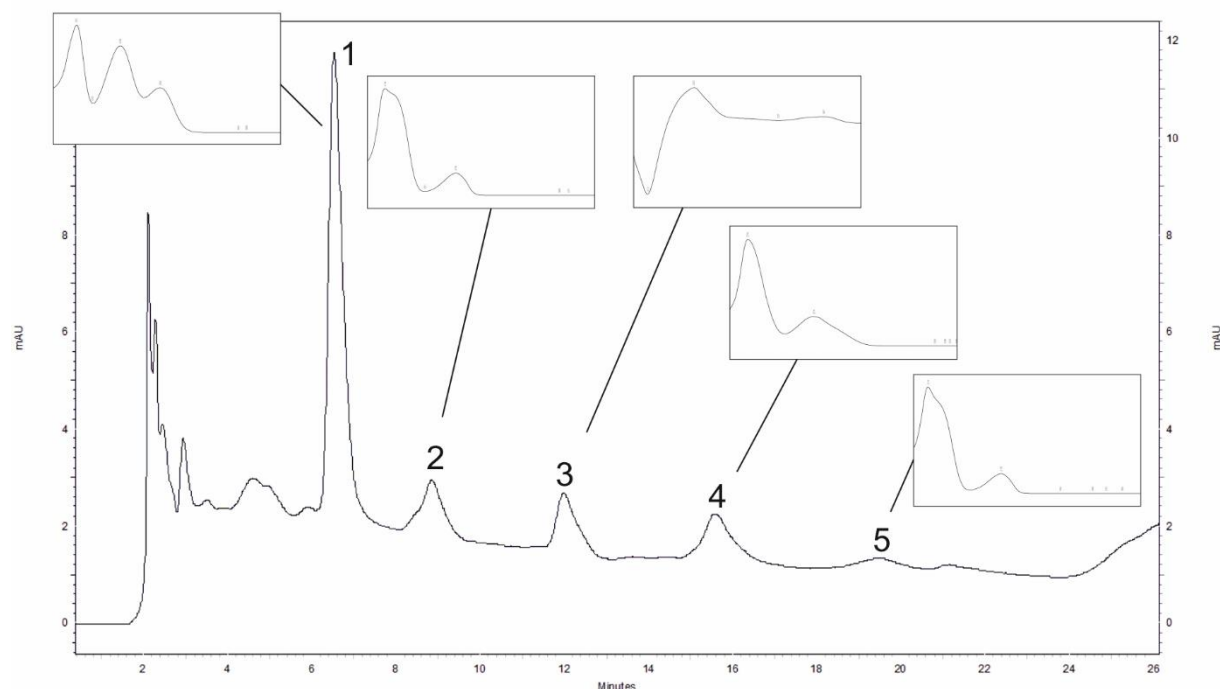

**Supp. Fig.2** The representative HPLC-UV chromatogram ( $\lambda = 254$  nm) of *Taxus cuspidate* bark extract; 1 - gallic acid (tR=3.2 min), 2 - protocatechuic acid (tR=6.3 min), 3 - chlorogenic acid (tR=9.2 min), 4 - p-hydroxybenzoic acid (tR=11.8 min), 5 - caffeic acid (tR=15.2 min), 6 - hydroxycaffeic acid (tR=15.8 min).

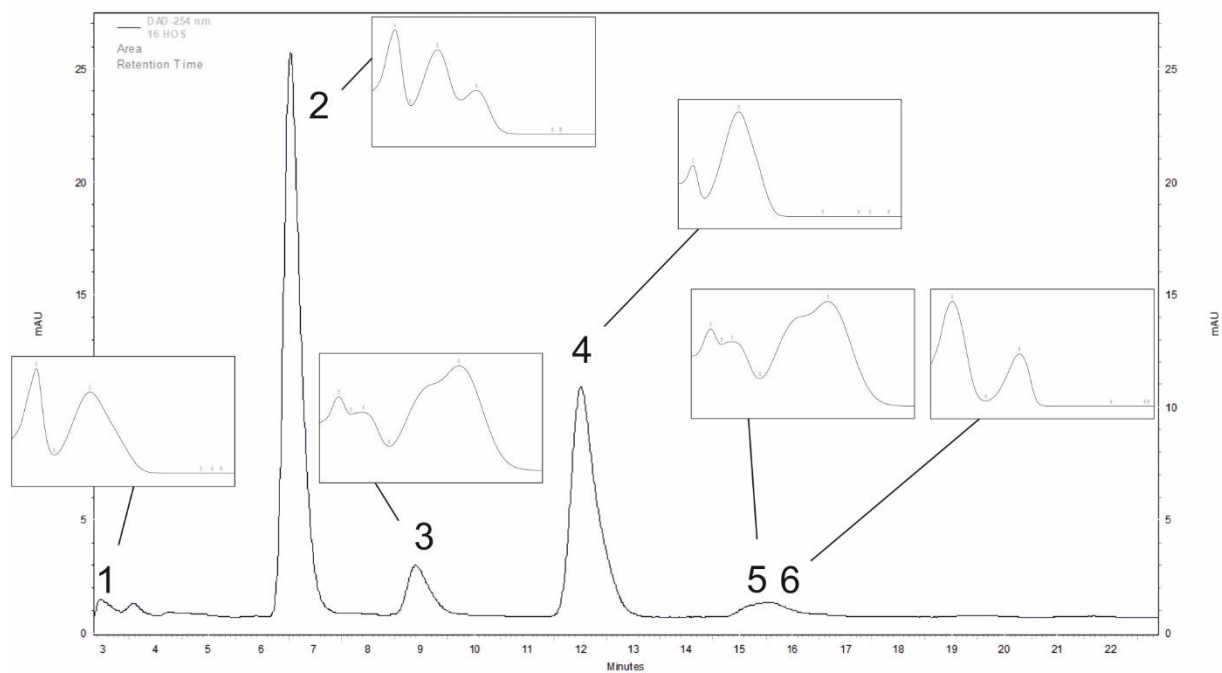

**Supp. Fig.3** The representative HPLC-UV chromatogram ( $\lambda = 254$  nm) of *Catalpa speciosa* bark extract; 1 - gallic acid ( $t_R=3.2$  min), 2 - protocatechuic acid ( $t_R=6.3$  min), 3 – catechin ( $t_R=8.8$  min), 4- p-hydroxybenzoic acid ( $t_R=11.8$  min), 5 - vanillic acid( $t_R=12$  min), 6 -caffeic acid ( $t_R=15.2$  min), 7 - p-coumaric acid( $t_R=26$  min), 8 - ferulic acid( $t_R=34.4$  min).

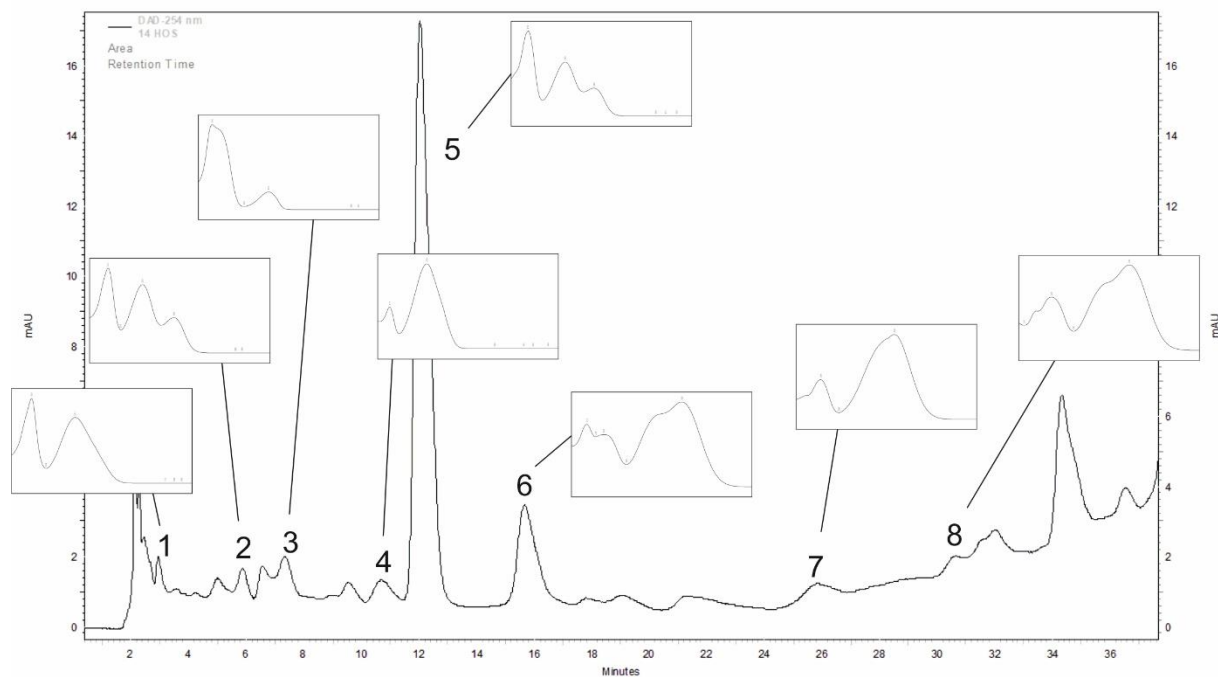

Supplement: molecules-24-00412-s001.pdf [file molecules-24-00412-s001.pdf]
